# Supplementary material
Source: publisher figshare collection journal article supplement (https://frontiersin.figshare.com/ndownloader/files/23084105)

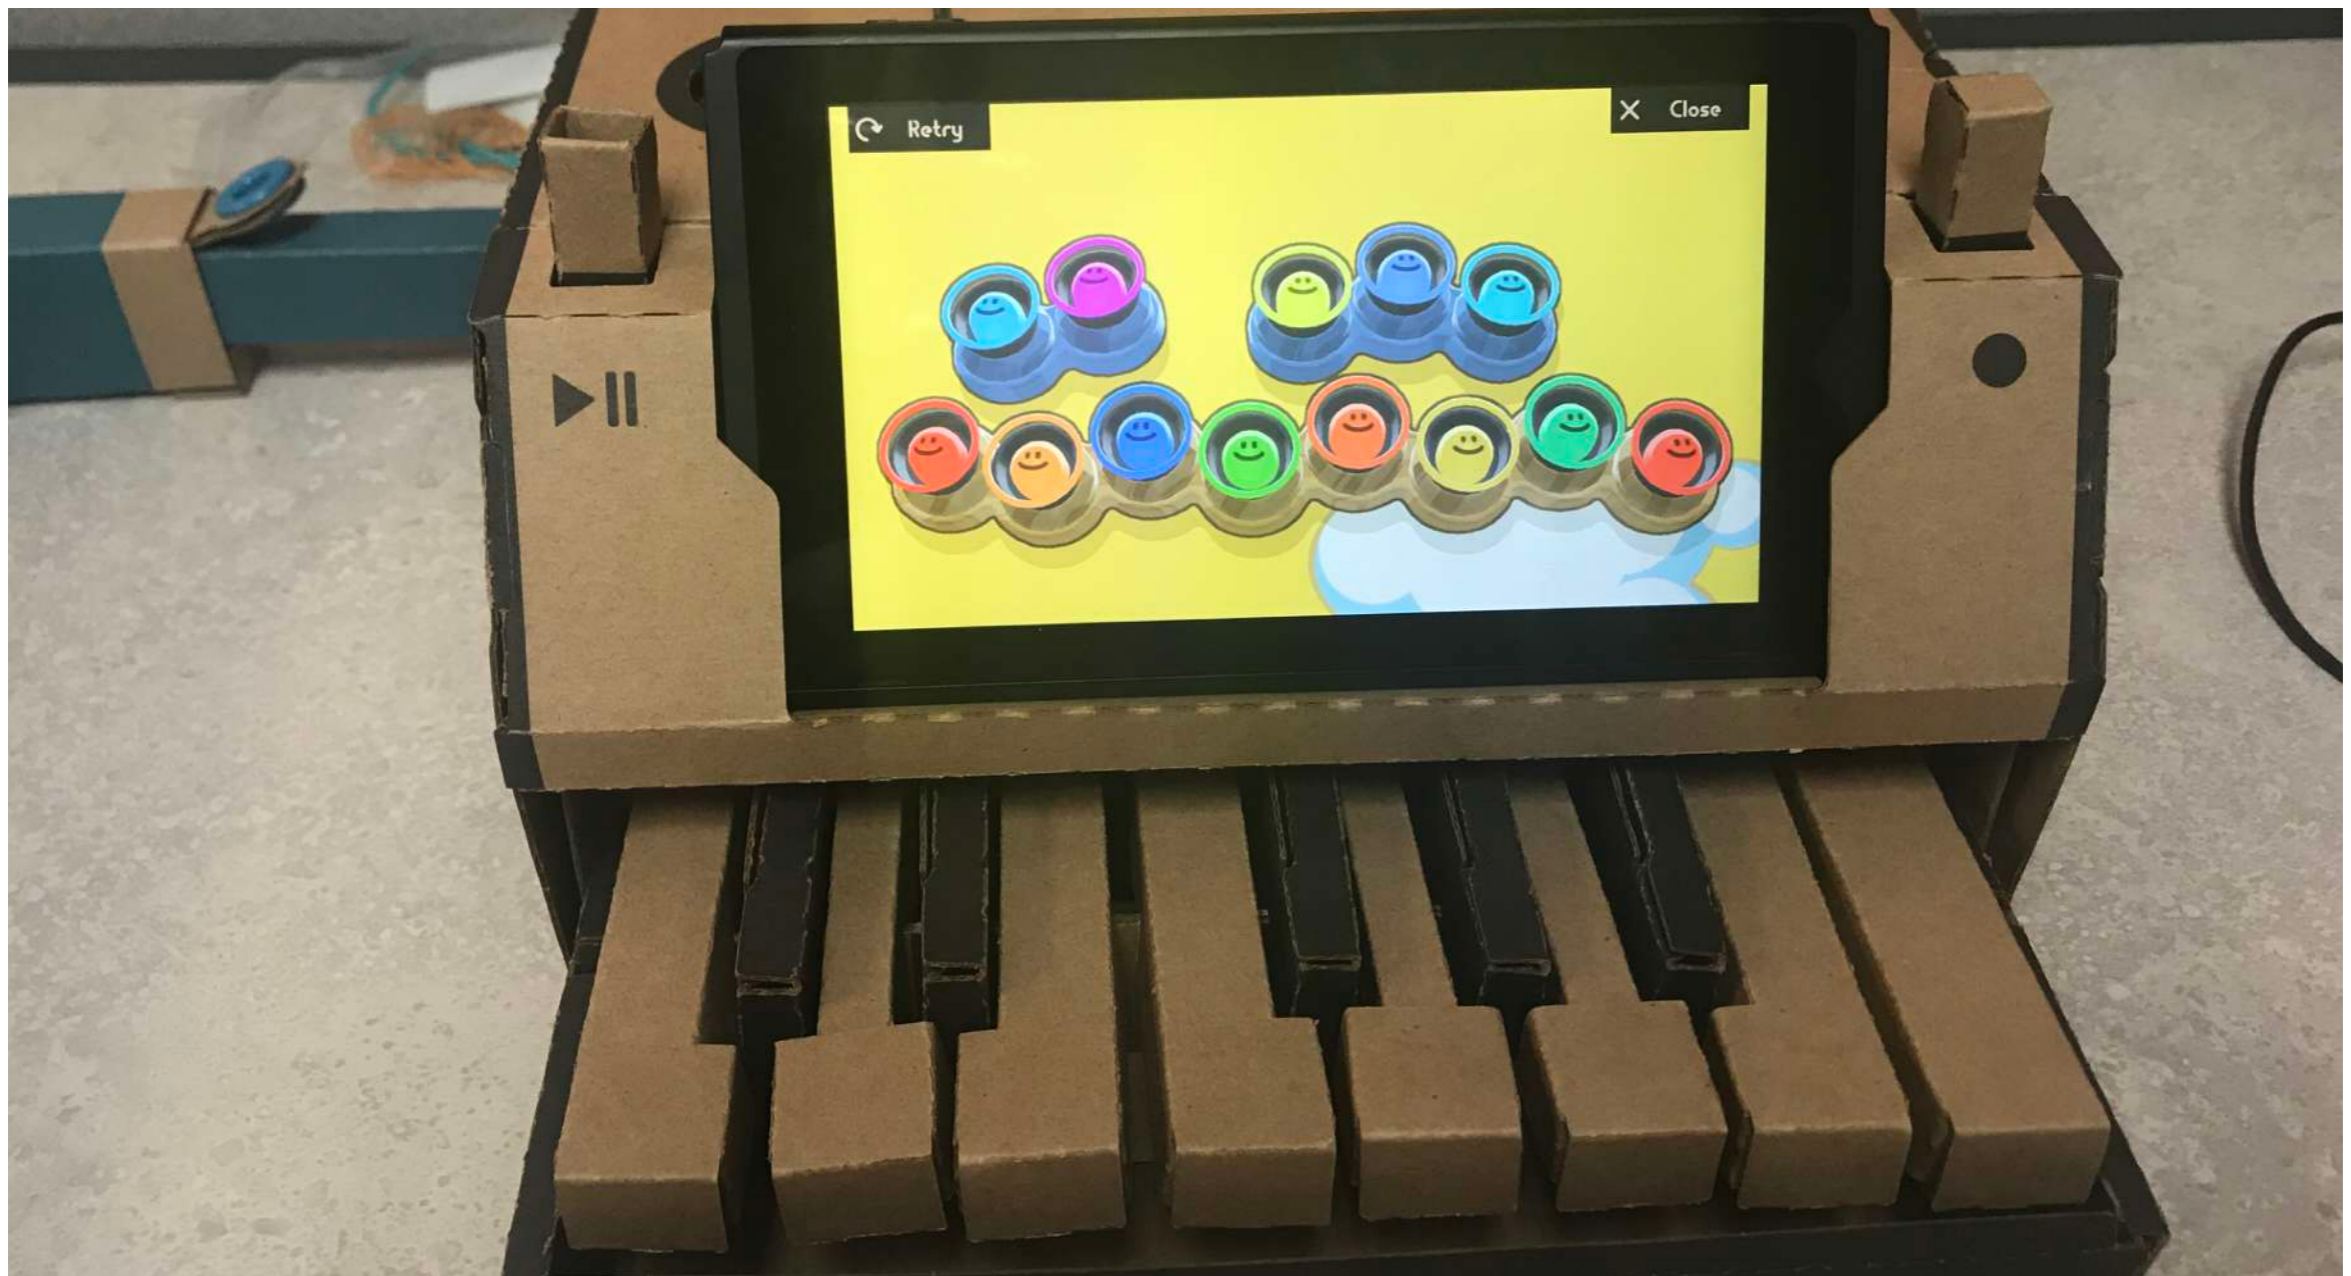

Becoming a Piano — again.  
Cardboard & Nintendo Switch/LABO

---

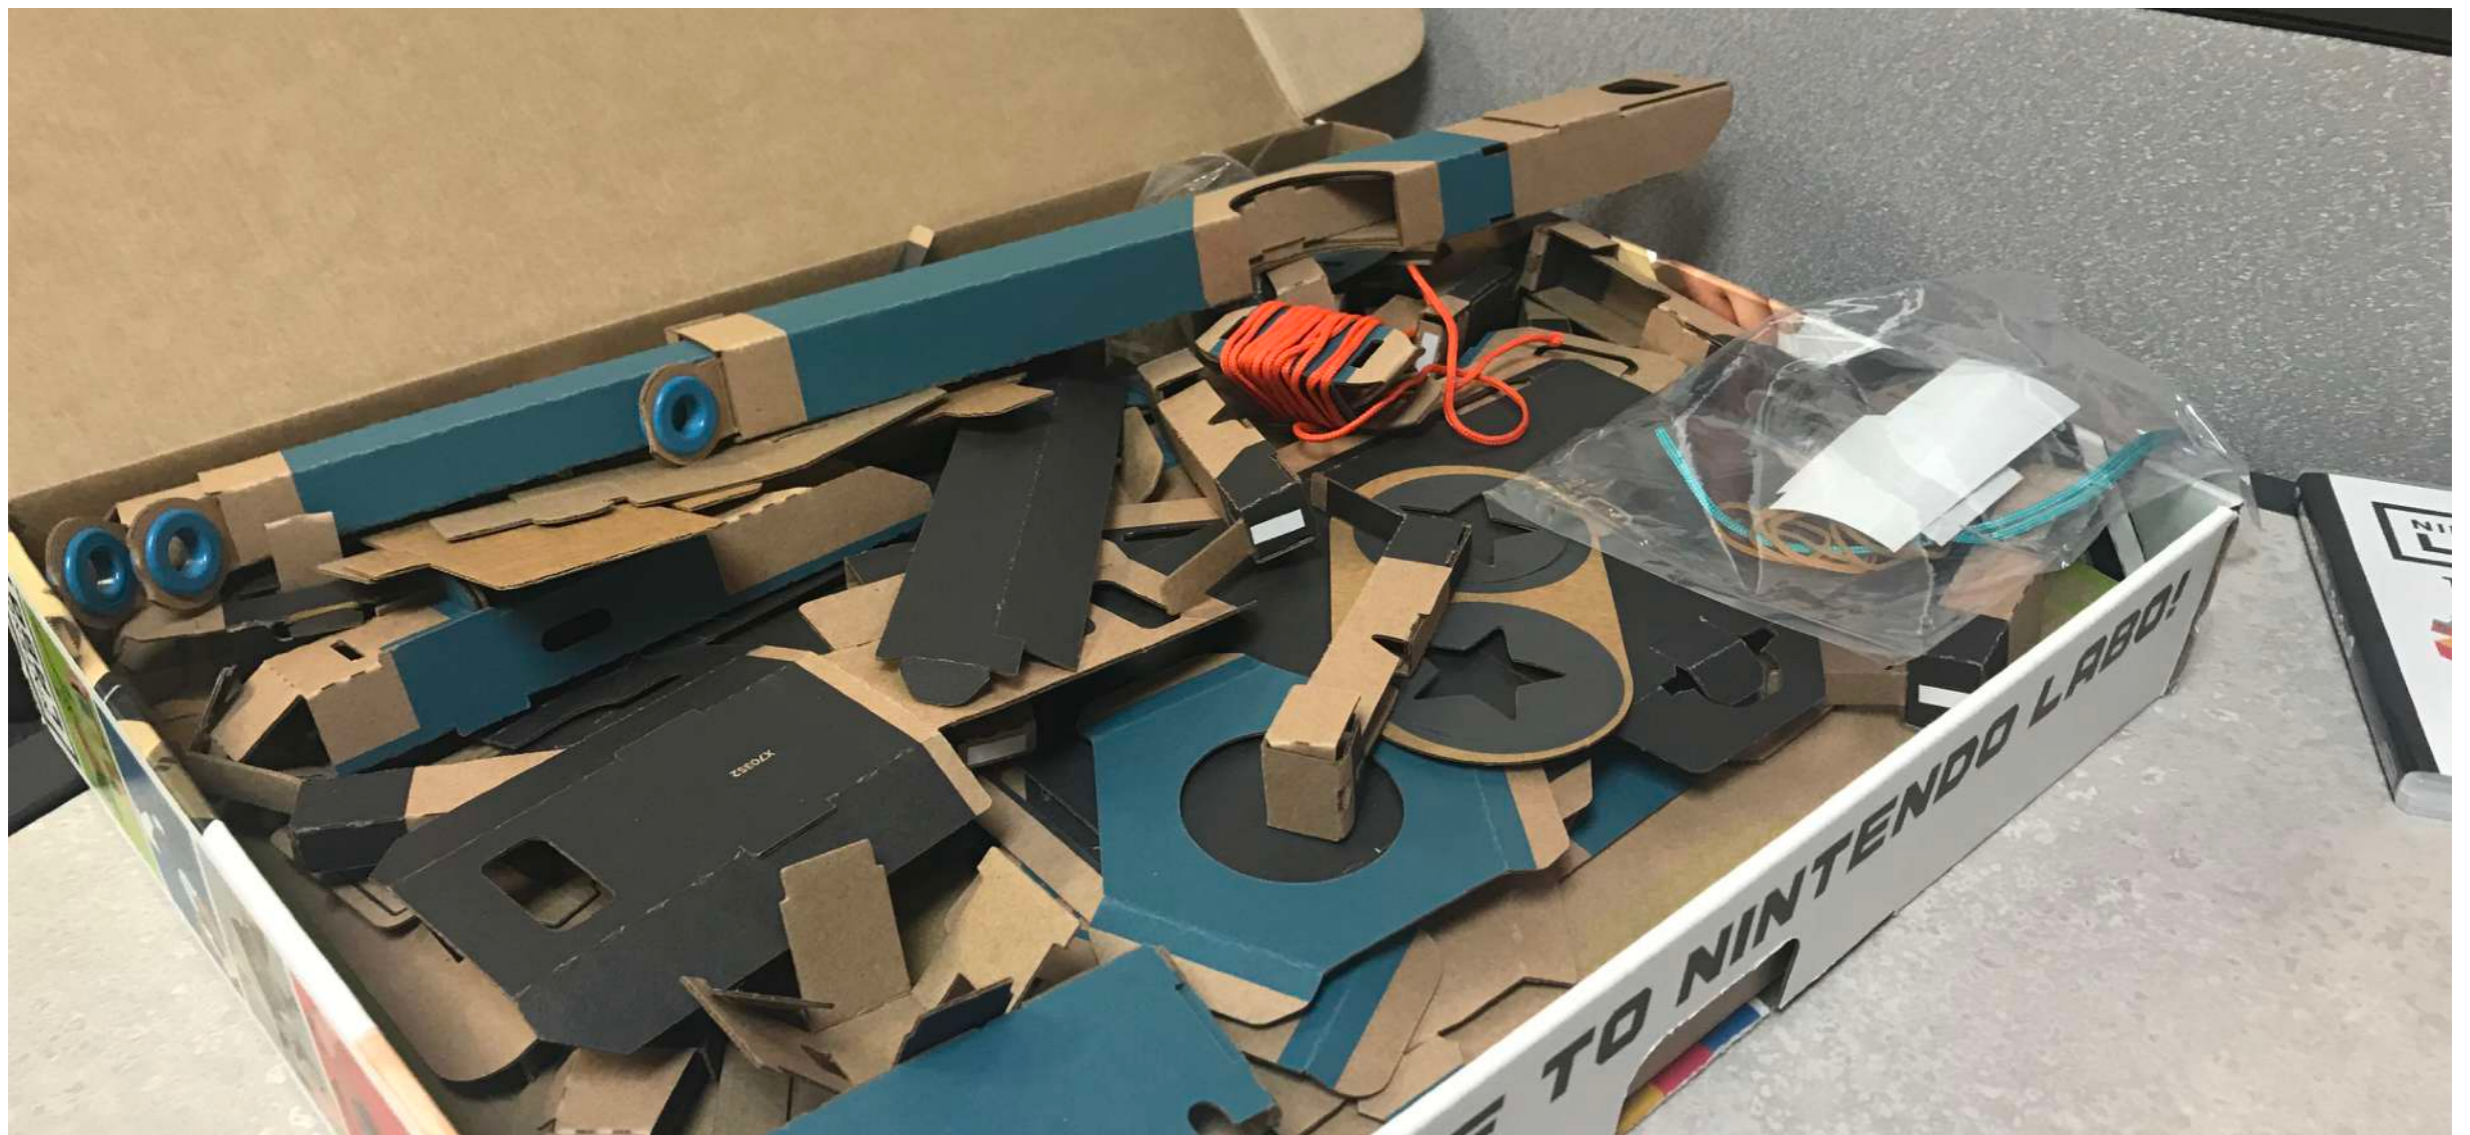

## Starting Point

The individual pieces are ripped apart, some flattened, some half constructed in a box mixed with other cardboard pieces for the same or other objects. A single piece is in the company of many, however, disconnected again from when they once where in connection with others.

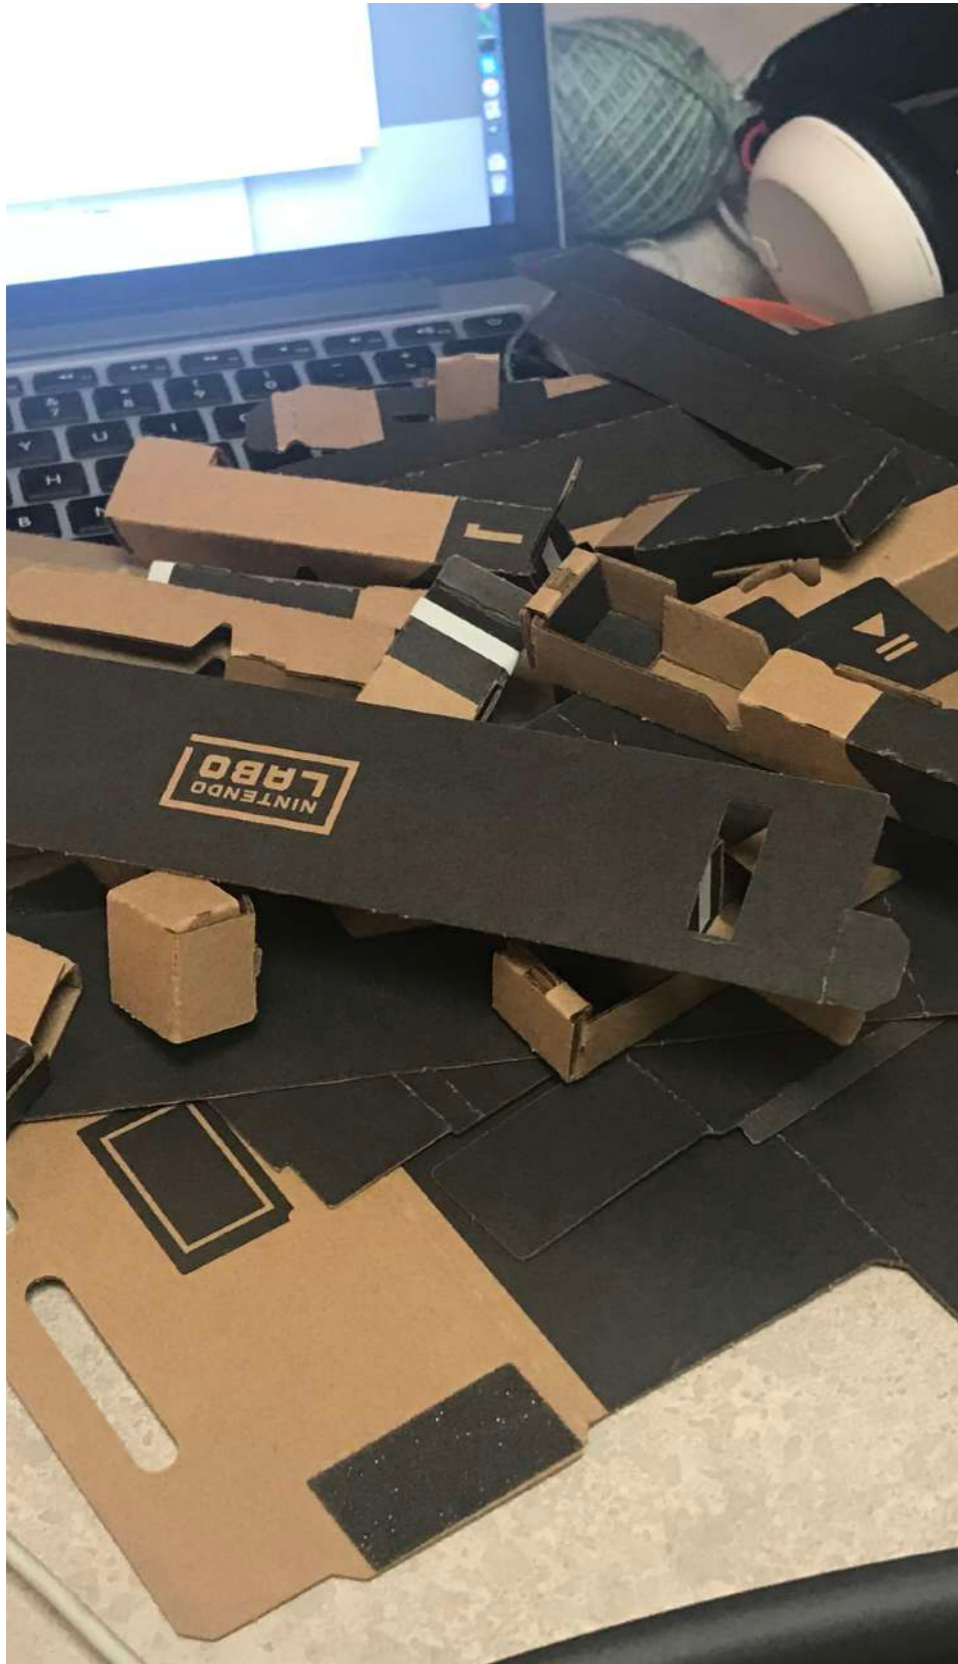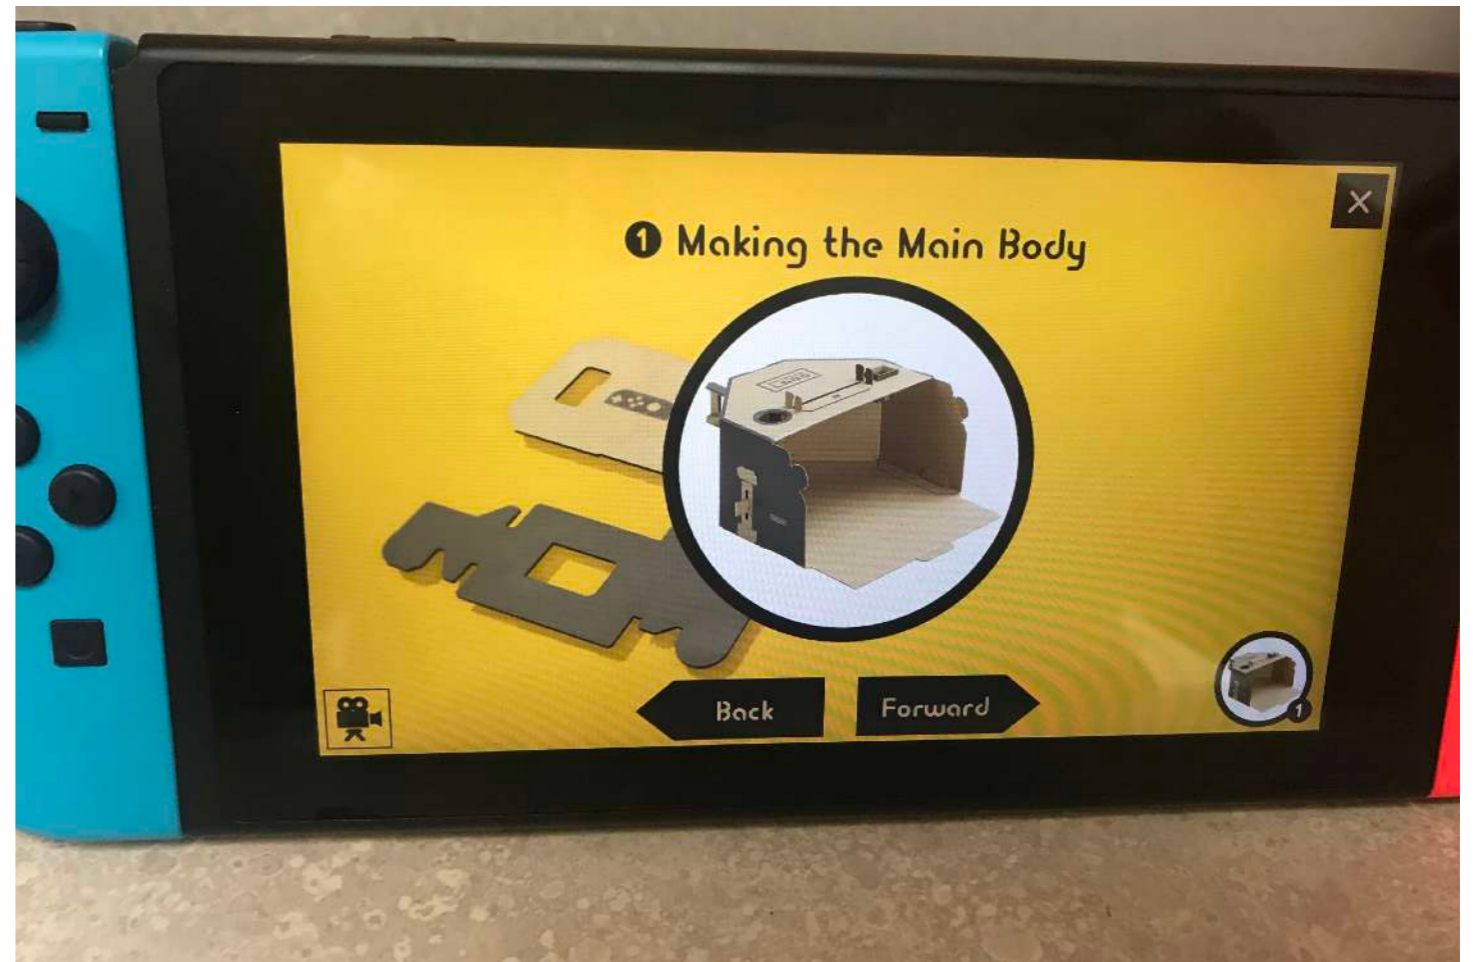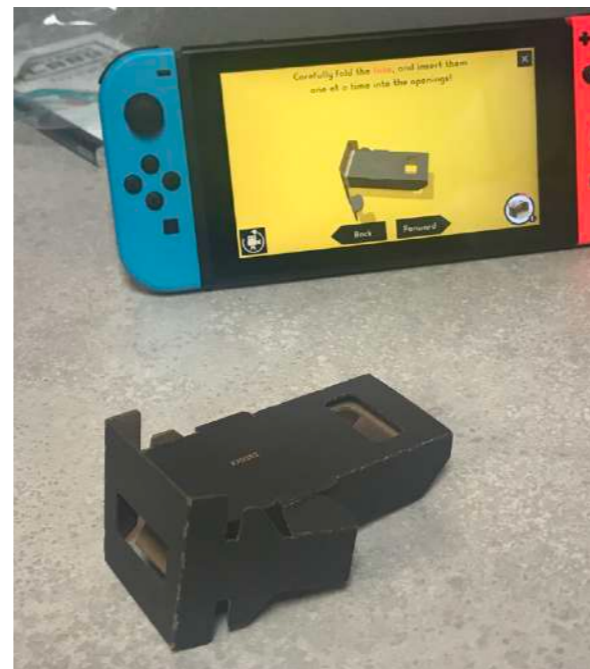

## Unexpected states

The instructions expect a certain state that is not replicated physically. The pieces are in a state which is not accounted for. They become **again**.

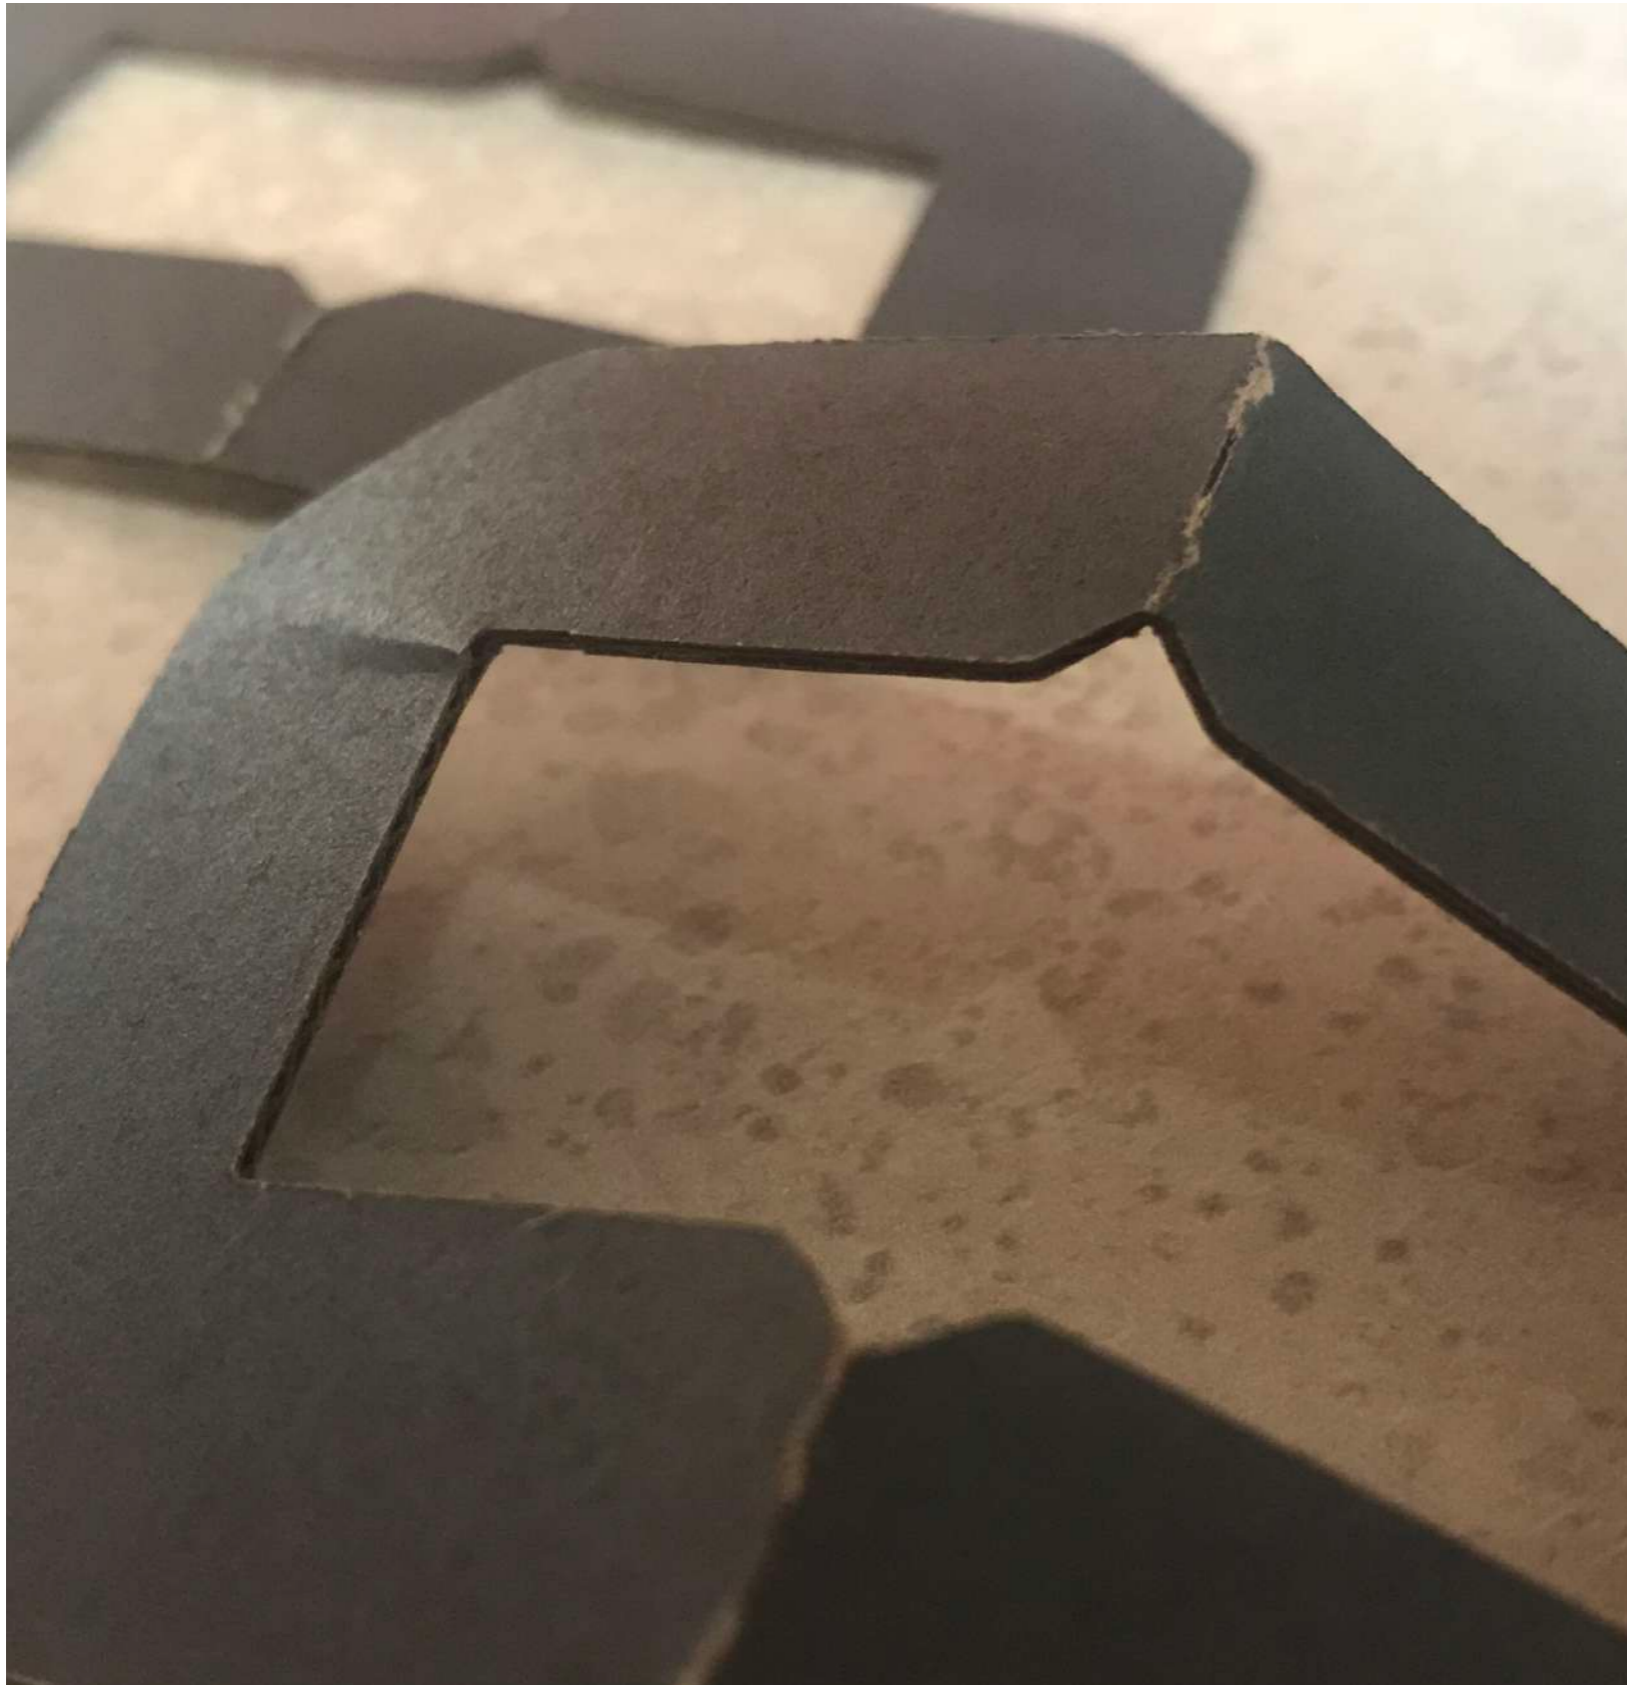

## Traces

There is history in the material,  
which is inscribed into it. A  
history it only holds for itself.

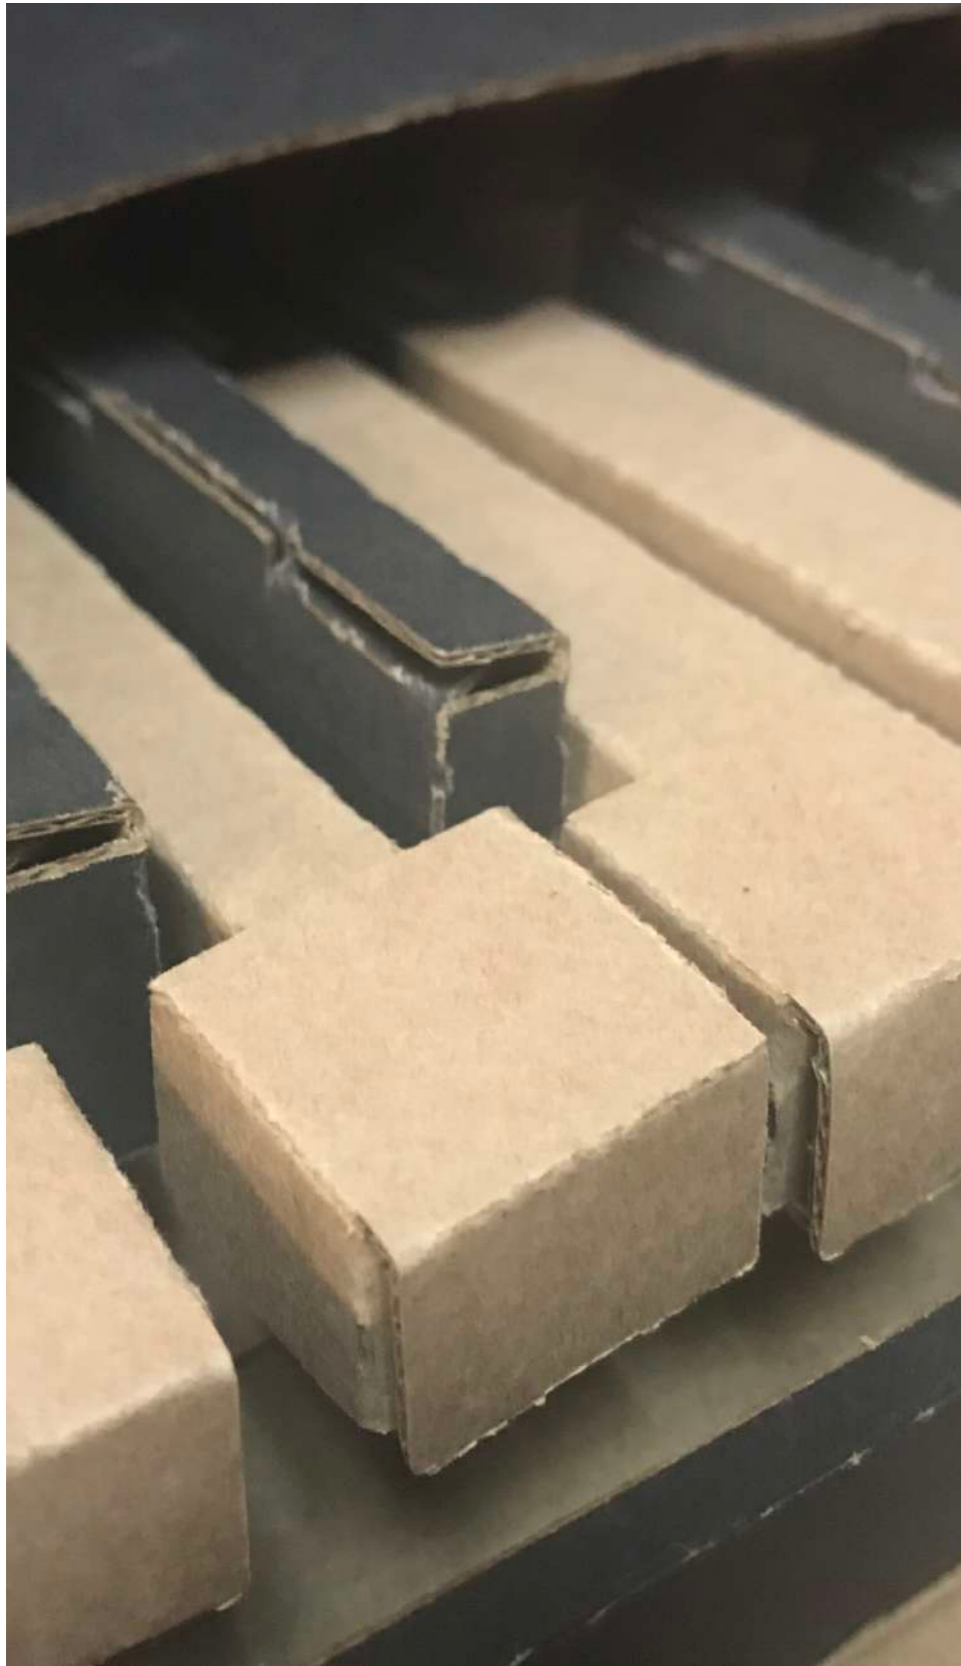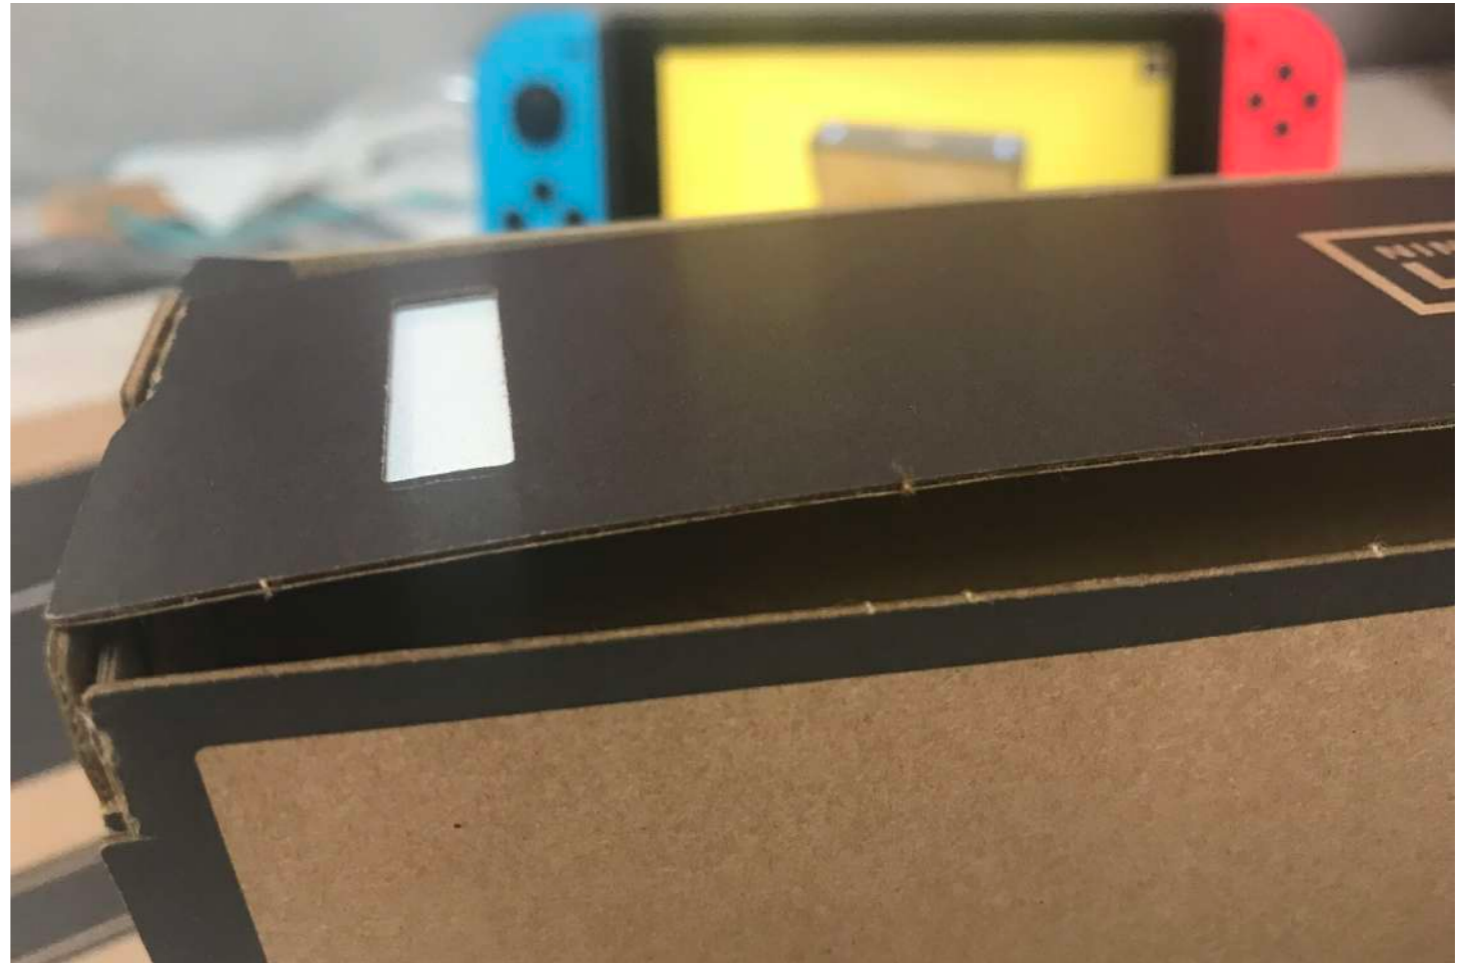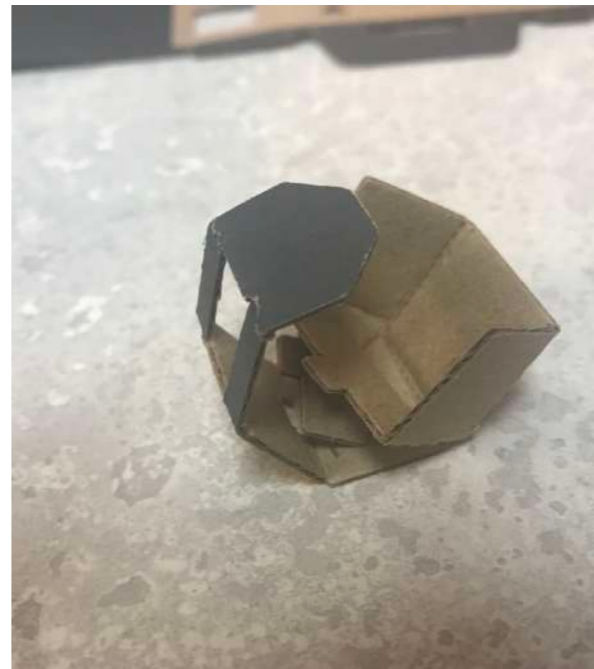

## Acting against

While external forces are still acting upon the material to make it become again, it resists these by remembering previous forms.

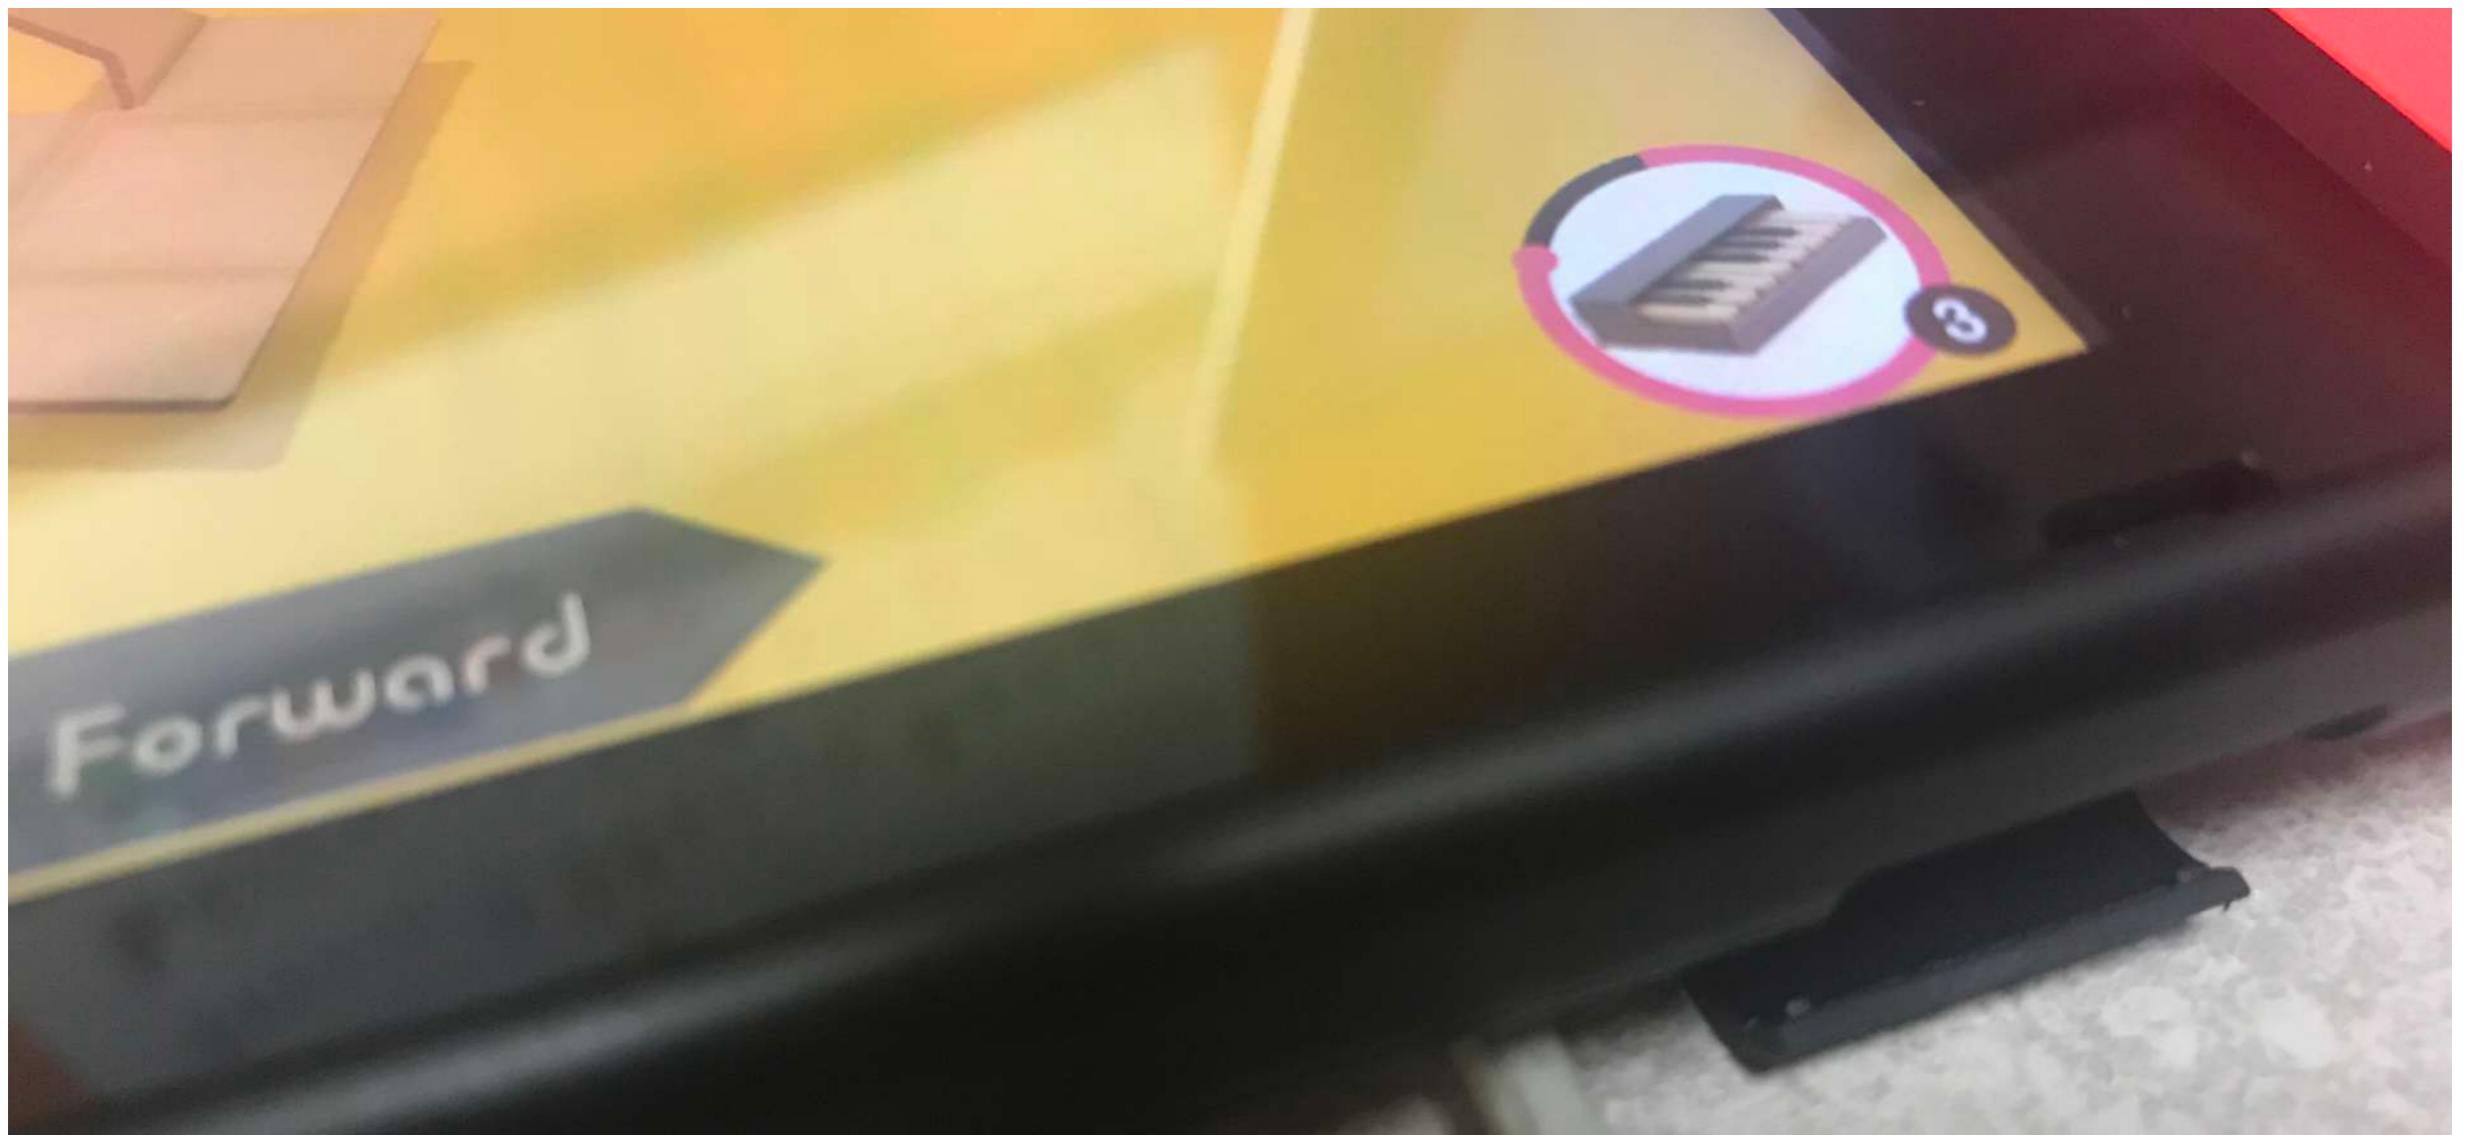

### *instructions*

The switch itself is part of becoming and later is literally inserted into the cardboard to give it the technologically augmented functionality. During the becoming process, however, it acts more like a rigid bystander, repeating the same instructions ad nauseam until revealing the next steps while expecting a status quo that is not necessarily reflected by the cardboard.

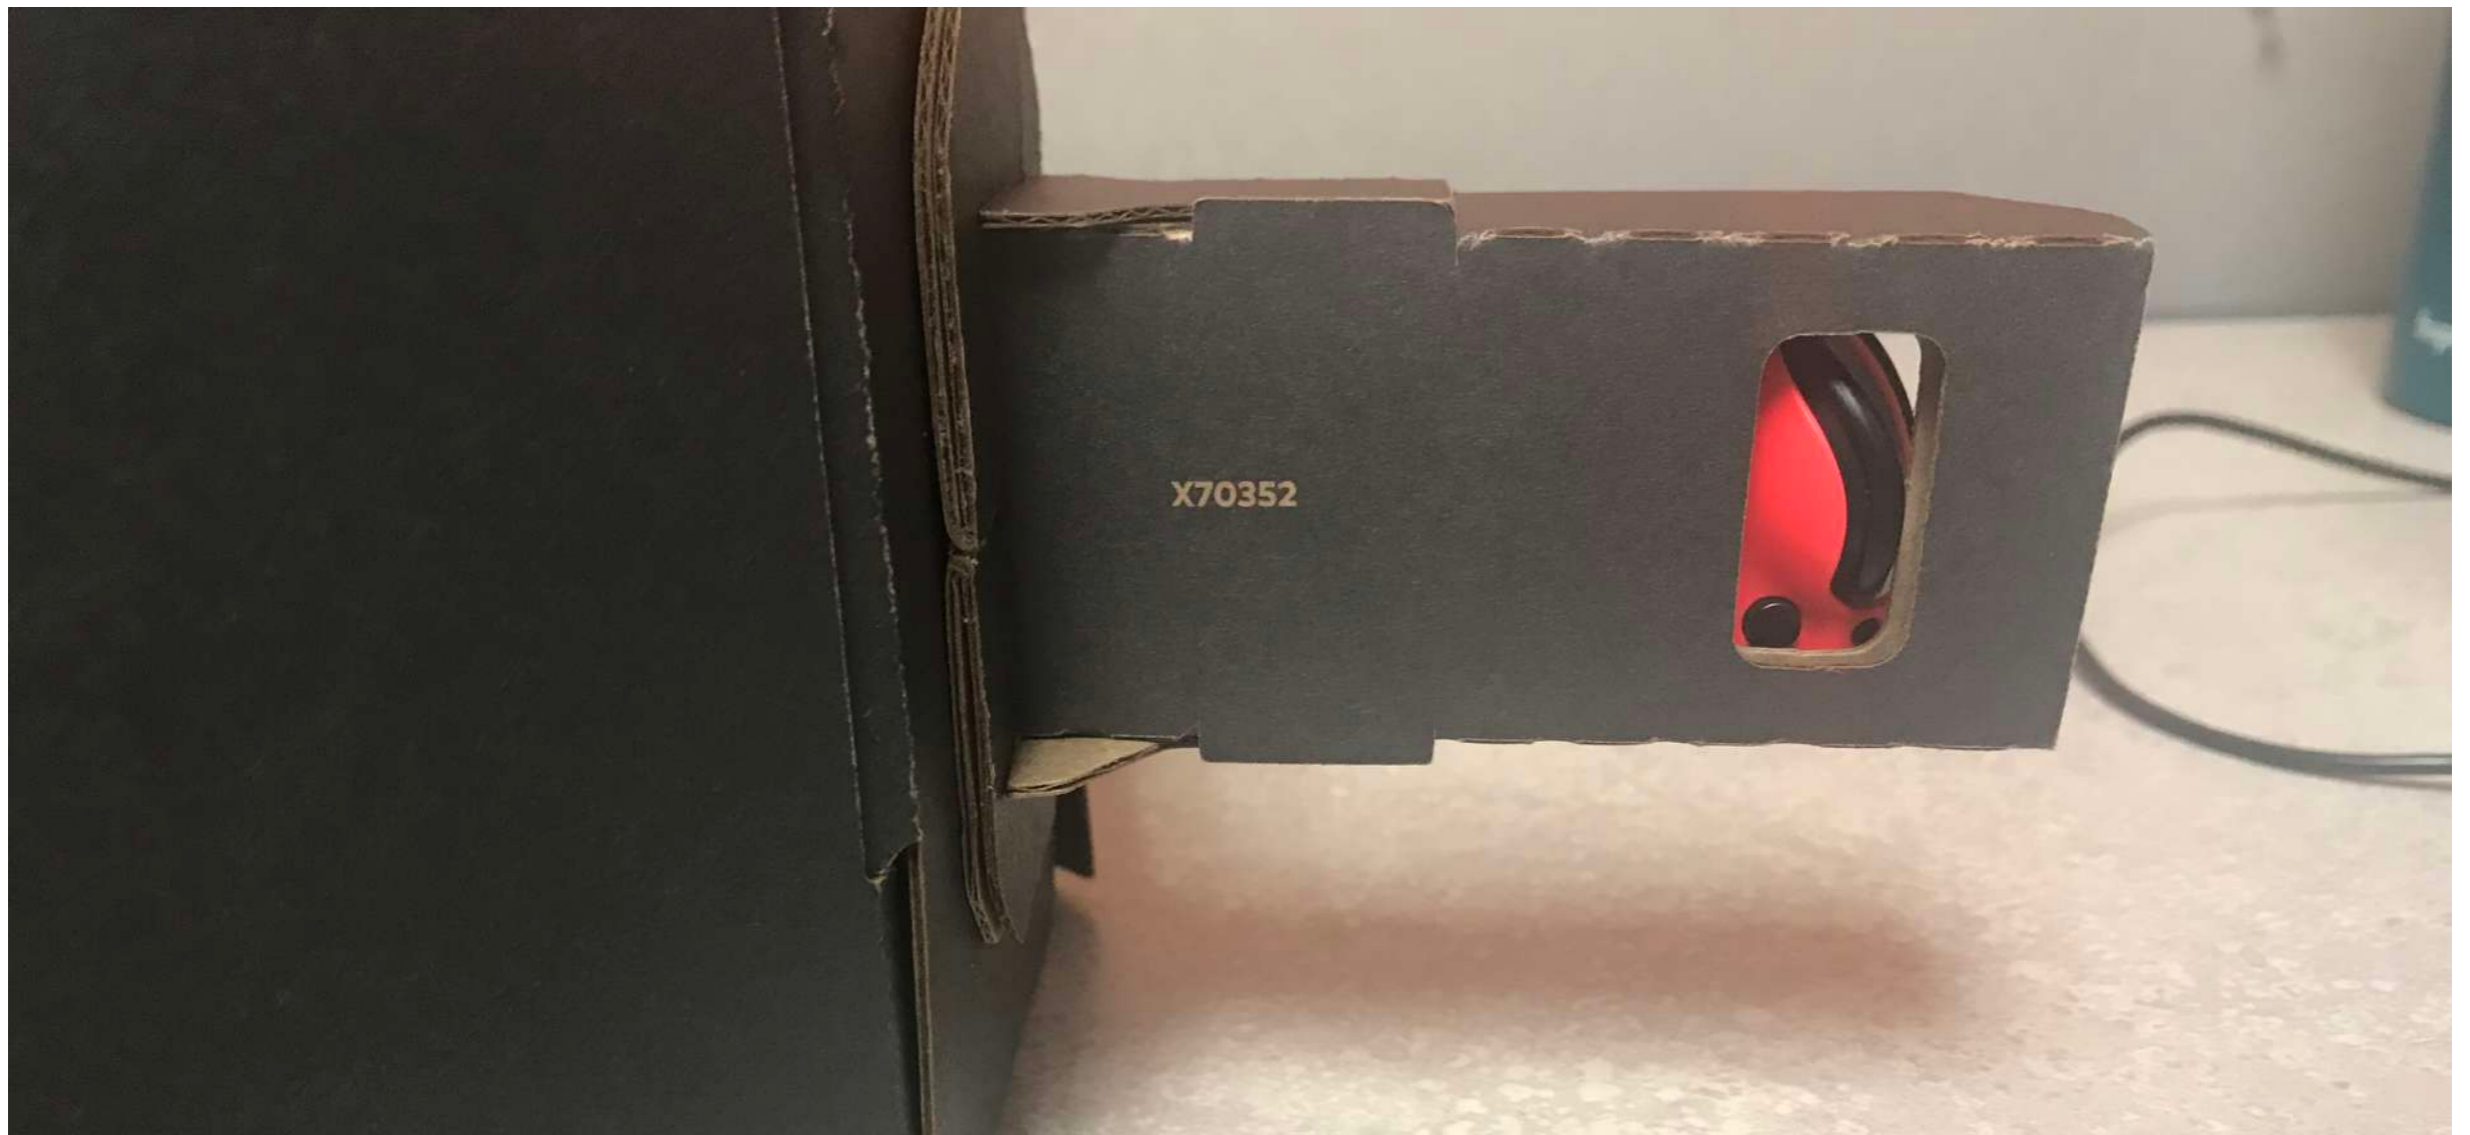

### *Places for things*

The joycon controller of the switch has a dedicated place that fits to its body, but also allows it to easily slide in and out without creating too much wear and tear on the cardboard. It has its place in the construction, but it is not a permanent place in contrast to how most of the cardboard pieces stay in place until their next disassembly.

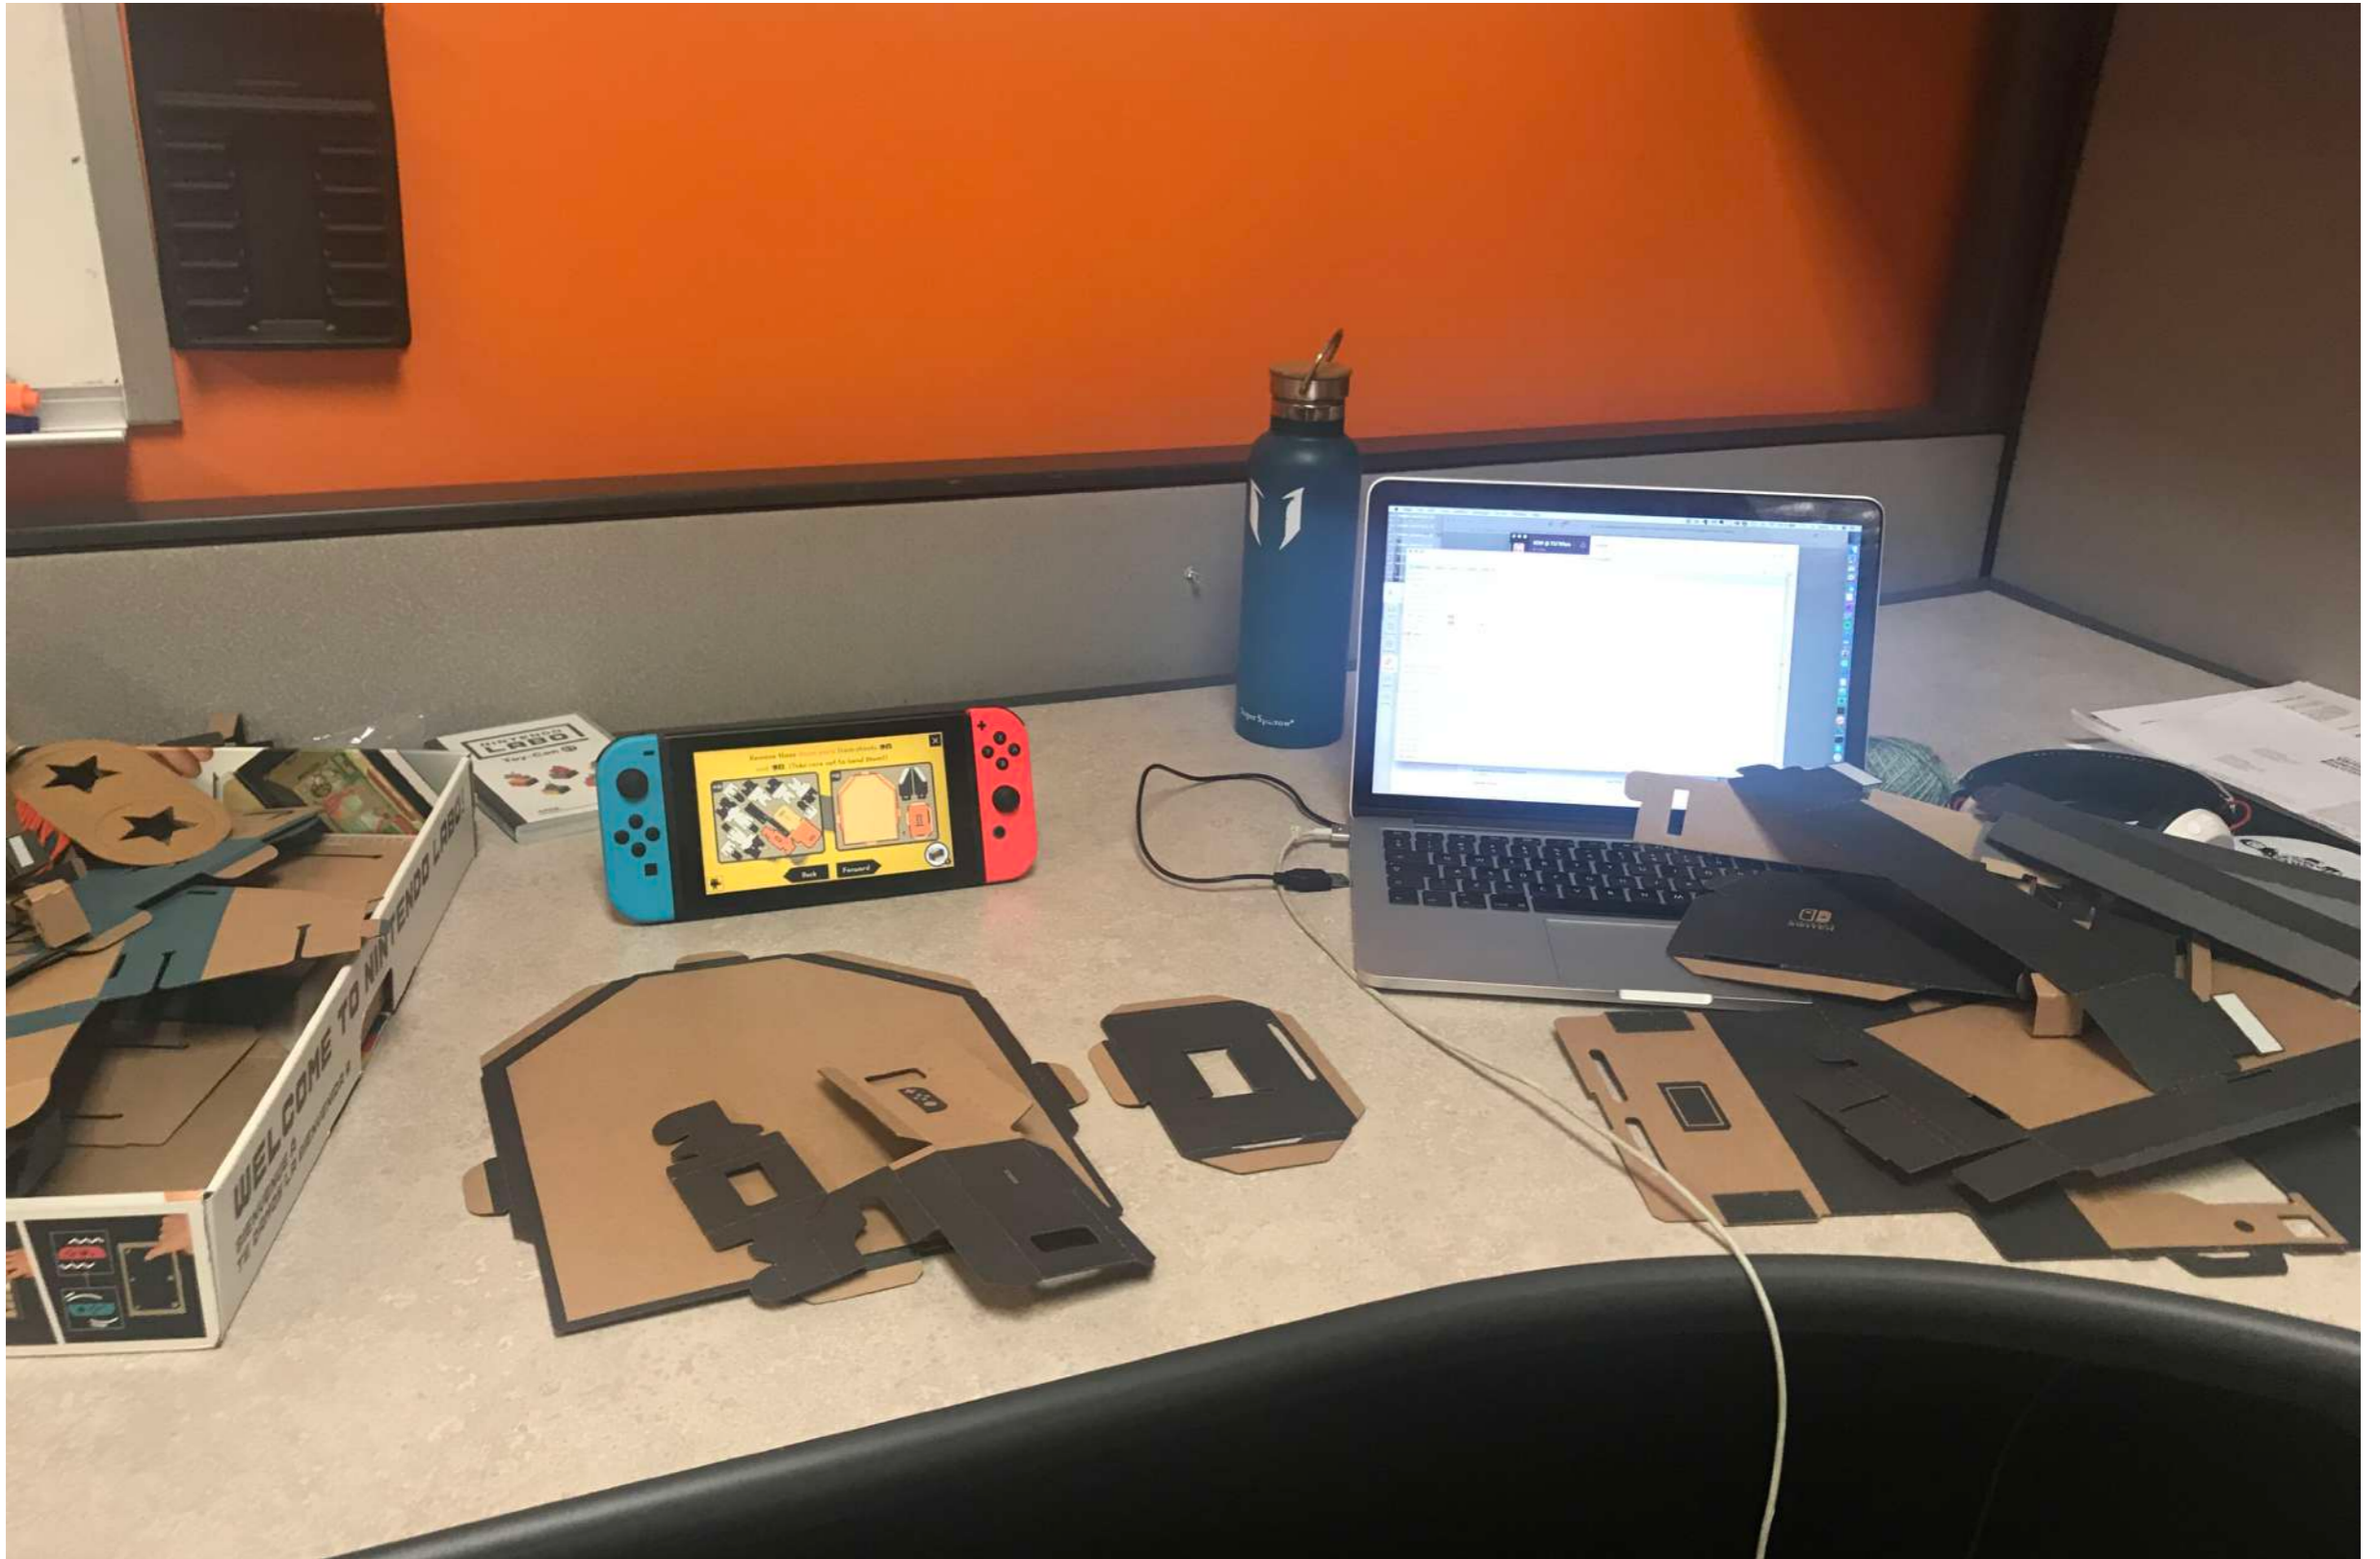

Supplement: Supplementary file 1 [file 23084105 › supplemental material/becoming/becoming_a_piano_again_compressed.pdf]
