# Supplementary material
Source: publisher figshare collection journal article supplement (https://frontiersin.figshare.com/ndownloader/files/23084105)
Supplement: Supplementary file 1 [file 23084105]

Archive with 20 entries (17 files):
- supplemental material/
- __MACOSX/._supplemental material
- supplemental material/.DS_Store
- __MACOSX/supplemental material/._.DS_Store
- supplemental material/acting/
- __MACOSX/supplemental material/._acting
- supplemental material/becoming/
- __MACOSX/supplemental material/._becoming
- supplemental material/acting/sound.png
- __MACOSX/supplemental material/acting/._sound.png
- supplemental material/acting/VR.png
- __MACOSX/supplemental material/acting/._VR.png
- supplemental material/becoming/.DS_Store
- __MACOSX/supplemental material/becoming/._.DS_Store
- supplemental material/becoming/becoming_a_house_compressed.pdf
- __MACOSX/supplemental material/becoming/._becoming_a_house_compressed.pdf
- supplemental material/becoming/becoming_a_piano_again_compressed.pdf
- __MACOSX/supplemental material/becoming/._becoming_a_piano_again_compressed.pdf
- supplemental material/becoming/becoming_a_statue_compressed.pdf
- __MACOSX/supplemental material/becoming/._becoming_a_statue_compressed.pdf
