# Supplementary material
Source: publisher figshare collection journal article supplement (https://frontiersin.figshare.com/ndownloader/files/23084105)

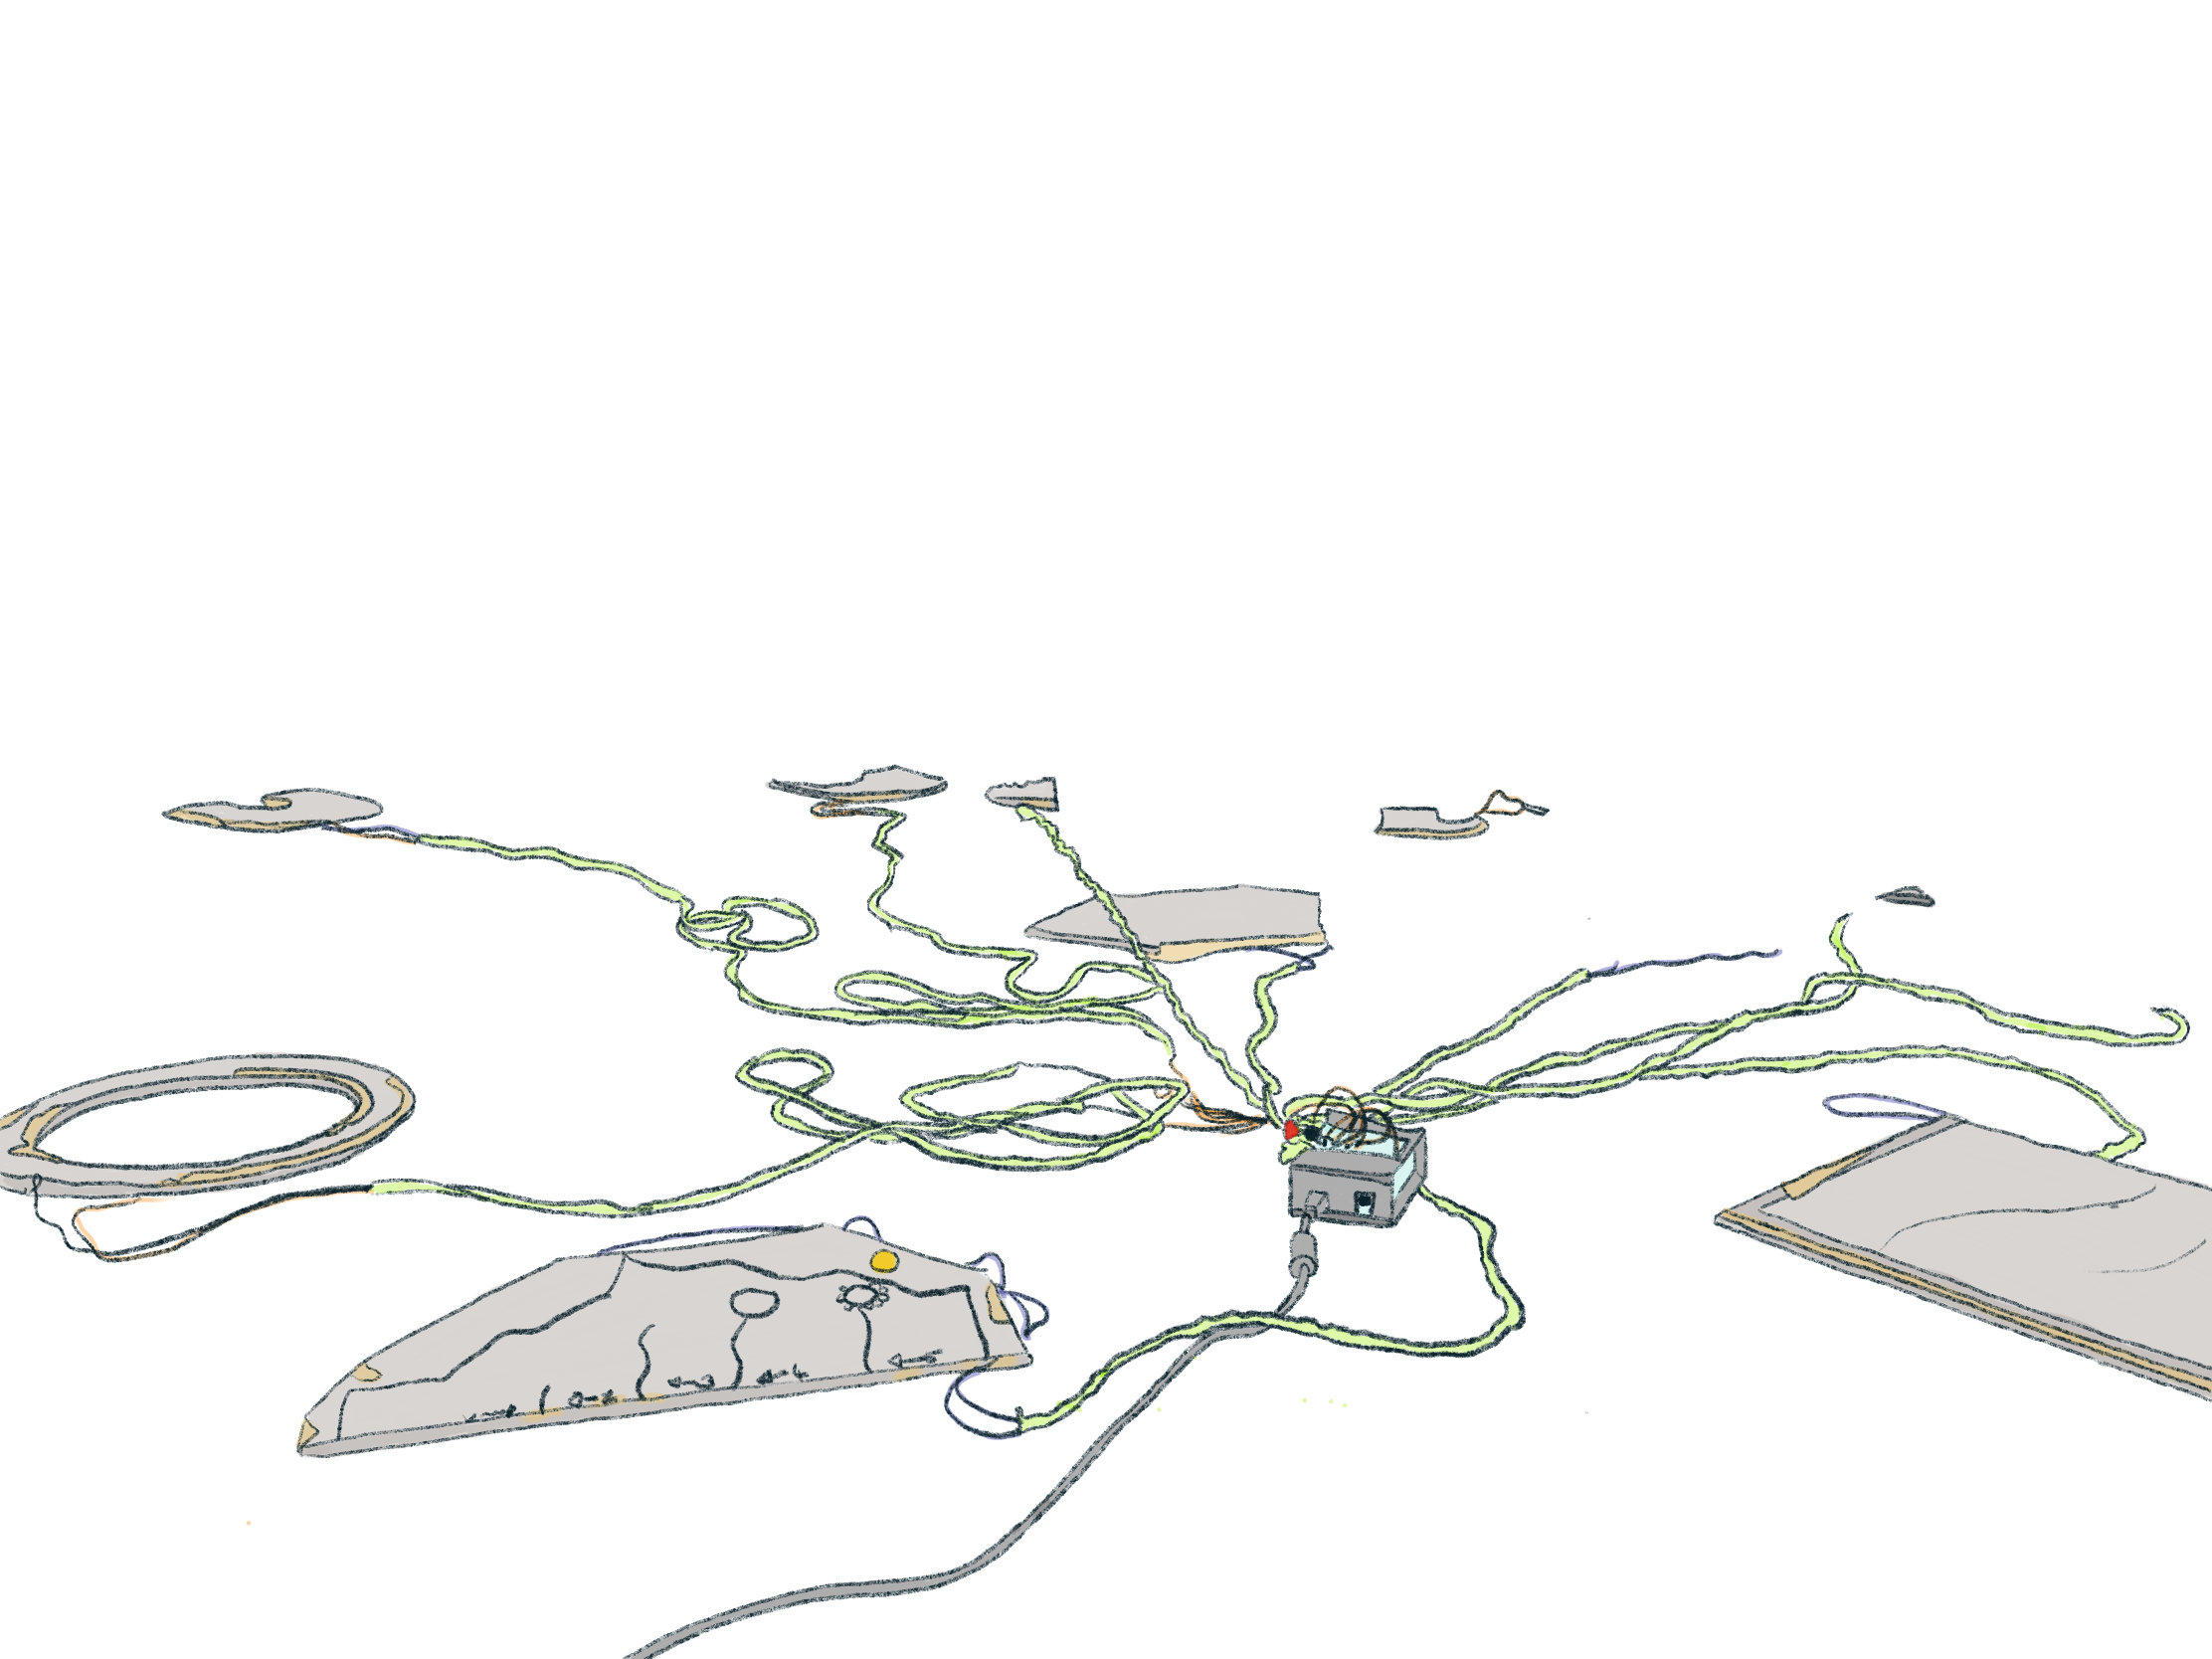

Supplement: Supplementary file 1 [file 23084105 › supplemental material/acting/sound.png]

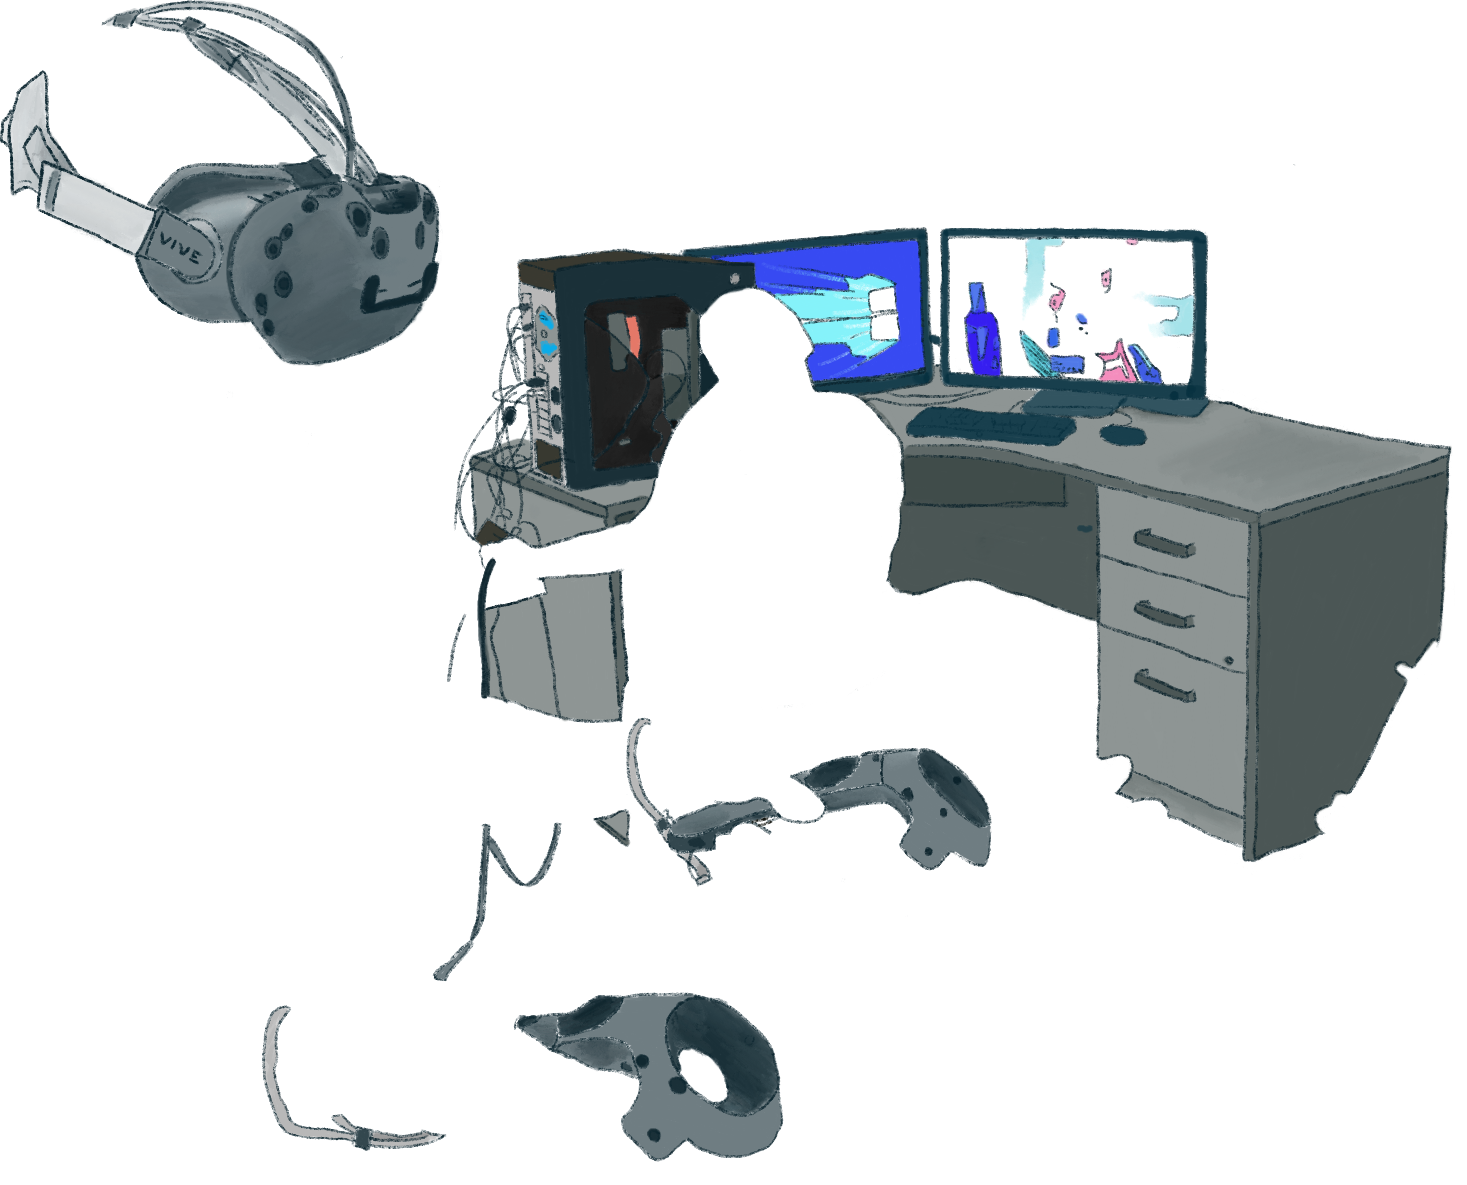

Supplement: Supplementary file 1 [file 23084105 › supplemental material/acting/VR.png]
